# Supplementary material for: Modelling the Impact of Robotics on Infectious Spread Among Healthcare Workers
Source: Frontiers journal article supplement (doi:10.3389/frobt.2021.652685), 2021-05-25
Supplement: Data_Sheet_1.pdf [file Data_Sheet_1.pdf]

## *Supplementary Material*

### 1. Supplementary Figures and Tables

| <b>Roboter Name</b>   | <b>Function</b>                                                                                                                                                | <b>Company</b>                                                         | <b>Literature</b>          | <b>Source</b>                   |
|-----------------------|----------------------------------------------------------------------------------------------------------------------------------------------------------------|------------------------------------------------------------------------|----------------------------|---------------------------------|
|                       | Introducing needles and catheters into deformable tissues such as blood vessels to draw blood or deliver fluids by using ultrasound                            | Department of Biomedical Engineering, Rutgers University of New Jersey | Chen et al.<br>(1)         |                                 |
| <b>SleepSmart</b>     | Multi-sensor mattress pad to diagnose chronic sleep disorders by detecting data such as heart rate, breathing rate, body orientation and index of restlessness |                                                                        | Van der Loos et al.<br>(2) |                                 |
| <b>Morpheus</b>       | Mattress actuation system to encourage a person to roll over in bed to alleviate snoring based on acoustic sensor data analysis                                |                                                                        |                            |                                 |
|                       | Measuring vital signs                                                                                                                                          | University of Auckland, New Zealand                                    | Broadbent et al.<br>(3)    |                                 |
| <b>ElliQ</b>          | Social tasks: virtual communication, proactive suggestions, entertainment and health activities                                                                | Intuition Robotics                                                     |                            |                                 |
|                       | Organizational tasks: medication reminders, appointment scheduling, cab calls                                                                                  |                                                                        |                            |                                 |
| <b>ROBEAR</b>         | Lifting and carrying patients (nursing robot): elderly and handicapped                                                                                         | RIKEN and Sumitomo Riko Limited                                        |                            |                                 |
| <b>RIBA / RIBA-II</b> | Lifting and carrying patients (nursing robot)                                                                                                                  | RIKEN                                                                  |                            | <a href="https://">https://</a> |

## Supplementary Material

|                                 |                                                                                                                                                                       |                                                                         |  |                                                                             |
|---------------------------------|-----------------------------------------------------------------------------------------------------------------------------------------------------------------------|-------------------------------------------------------------------------|--|-----------------------------------------------------------------------------|
| <b>SAM</b>                      | remote monitoring, physical safety (preventing falls), and virtual communication                                                                                      | Luvozo                                                                  |  | roboticsbiz.com/top-seven-companions-and-social-robots-for-elderly-people/  |
| <b>Zora</b>                     | Interactive caregiver: leading physical therapy classes, activities and exercises, entertaining patients (reading, TV etc.), educational tasks                        | Zora Bots / Oz Robotics                                                 |  |                                                                             |
| <b>iPal</b>                     | Caregiver: social companion, educator, safety monitor, health and emergency service and virtual communication                                                         | Avatar Mind                                                             |  |                                                                             |
| <b>Care-O-Bot</b>               | Household tasks: delivering food, drinks and medications to patient, assisting in cooking and cleaning                                                                | Fraunhofer Institute for Manufacturing Engineering and Automation       |  |                                                                             |
|                                 | Health care: emergency calls, virtual communication                                                                                                                   |                                                                         |  |                                                                             |
| <b>BUDDY</b>                    | Detection of falls or unusual events, alert emergency service, home protection, tracking capabilities                                                                 | Blue Frog Robotics                                                      |  |                                                                             |
| <b>Xenex Germ-Zapping Robot</b> | Disinfection of entire hospital rooms within minutes using pulsed, full-spectrum UV rays that kill a range of infectious bacteria and viruses                         | XENEX Disinfection Systems                                              |  | https://online-engineering.case.edu/blog/medical-robots-making-a-difference |
| <b>PARO Therapeutic Robot</b>   | An animal-like robot that provides the benefits of animal therapy as a treatment for depression or other mental illness or as a method to recover better from surgery | National Institute of Advanced Industrial Science and Technology (AIST) |  |                                                                             |
| <b>TUG</b>                      | Ferrying supplies such as meals, linens, lab samples, waste and other items/materials                                                                                 | Aethon                                                                  |  |                                                                             |

|                   |                                                             |                       |                                                                                                                                                         |
|-------------------|-------------------------------------------------------------|-----------------------|---------------------------------------------------------------------------------------------------------------------------------------------------------|
| <b>GermFalcon</b> | Cleaning robot using UVC light to kill viruses and bacteria | Dimer UVC Innovations | <a href="https://www.medicaldevice-network.com/features/coronavirus-robotics/">https://www.medicaldevice-network.com/features/coronavirus-robotics/</a> |
|-------------------|-------------------------------------------------------------|-----------------------|---------------------------------------------------------------------------------------------------------------------------------------------------------|

**Table S1. Examples of assistive medical robots used in various fields of healthcare.**

| <b>Reproductive number (<math>R_0 = 4.4</math>)</b> |                                      |                                       |                                         |
|-----------------------------------------------------|--------------------------------------|---------------------------------------|-----------------------------------------|
|                                                     | <b>Non-spreading</b>                 | <b>Infected individuals</b>           |                                         |
| <b>Scenario</b>                                     | <b>Ratio of non-spreading trials</b> | <b>Mean % of infected individuals</b> | <b>Median % of infected individuals</b> |
| No robotic assistance                               | 0.10                                 | 71                                    | 78                                      |
| Assist Rand 5 NUR                                   | 0.16                                 | 66                                    | 76                                      |
| Assist Top 5 NUR                                    | 0.22                                 | 57                                    | 71                                      |
| Assist Top 3 NUR-Rand 2 MD                          | 0.21                                 | 60                                    | 71                                      |
| Assist all NUR-PAT contacts                         | 0.23                                 | 47                                    | 57                                      |

**Table S2. Effect of robotic interventions in different scenarios.** Percentage of non-spreading trials, mean and median percentage of infected individuals in the geriatric. Results for  $R_0 = 4.4$  over 100 trials.

Supplementary Material

| <b>Reproductive number (<math>R_0 = 4.4</math>)</b> |                                                                    |               |                |               |
|-----------------------------------------------------|--------------------------------------------------------------------|---------------|----------------|---------------|
|                                                     | <b><math>I_{30}</math> (number of active infections at day 30)</b> |               |                |               |
| <b>Scenario</b>                                     | <b>NUR</b>                                                         | <b>MD</b>     | <b>PAT</b>     | <b>ADM</b>    |
| No robotic assistance                               | $11.8 \pm 0.4$                                                     | $6.8 \pm 0.2$ | $11.3 \pm 0.3$ | $2.7 \pm 0.1$ |
| Assist Rand 5 NUR                                   | $9.0 \pm 0.4$                                                      | $6.2 \pm 0.3$ | $9.2 \pm 0.4$  | $2.6 \pm 0.2$ |
| Assist Top 5 NUR                                    | $6.7 \pm 0.3$                                                      | $5.2 \pm 0.4$ | $5.5 \pm 0.4$  | $2.0 \pm 0.2$ |
| Assist Top 3 NUR-Rand 2 MD                          | $9.4 \pm 0.4$                                                      | $4.4 \pm 0.3$ | $8.1 \pm 0.4$  | $2.5 \pm 0.1$ |
| Assist all NUR-PAT contacts                         | $10.4 \pm 0.4$                                                     | $6.6 \pm 0.3$ | $4.3 \pm 0.3$  | $2.7 \pm 0.1$ |

**Table S3. Splitting of infectious cases on day 30 ( $I_{30}$ ) by category.** Results for  $R_0 = 4.4$  over 100 trials.

| <b>Parameter</b> | <b>Description</b>                                                                  | <b>Value</b> |
|------------------|-------------------------------------------------------------------------------------|--------------|
| $\beta$          | Probability of disease transmission upon contact with Latent or Infected individual | 0.0015       |
| $\alpha$         | Proportion of asymptomatic infections                                               | 0.8          |
| $\tau_E$         | Average latency from Exposed to Latent                                              | 2 days       |
| $\tau_L$         | Average latency from Latent to Infected                                             | 5 days       |
| $\tau_{Iu}$      | Average latency from Asymptomatic Infected to Recovered                             | 12 days      |
| $\tau_{Id}$      | Average latency from Symptomatic Infected to Recovered                              | 7 days       |

**Table S4. Default model parameters.**

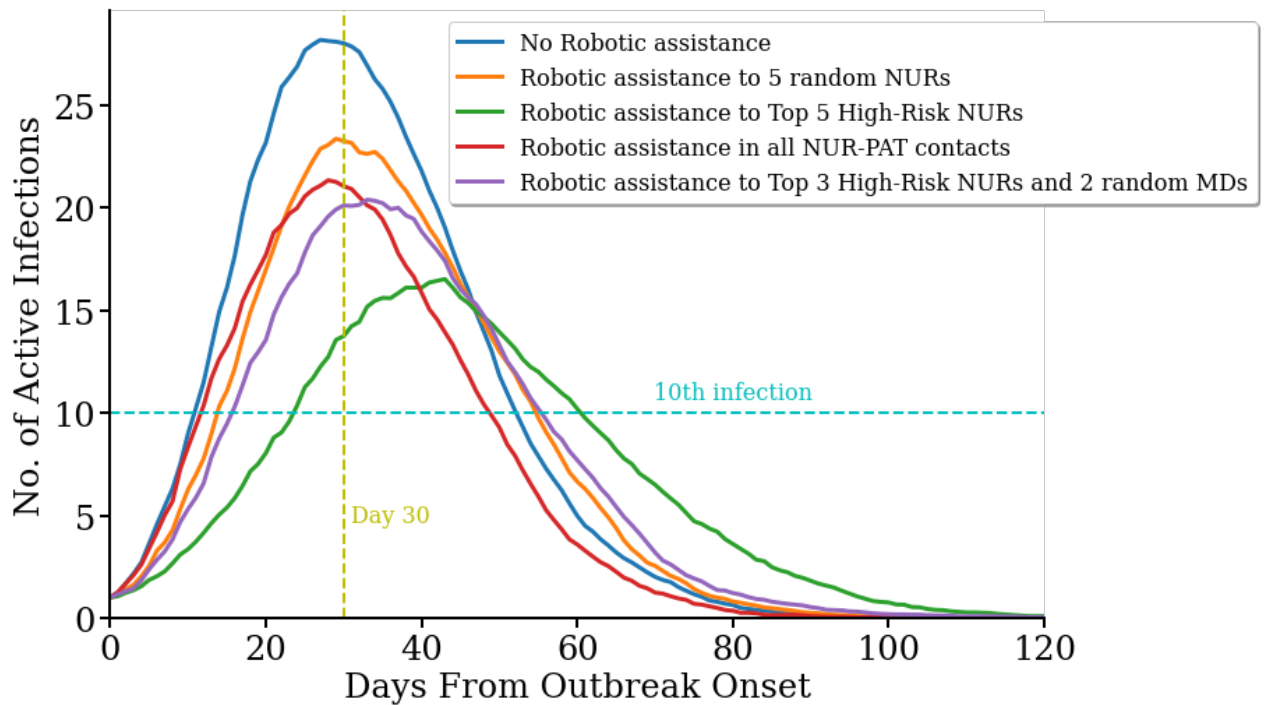

**Figure S1. Temporal evolution of infection spread across the network for different scenarios.  $R_0 = 3.4$ .** Number of active infected cases in 5 different scenarios as a function of the days passed since the first infection in the population at day 0. Average over 100 trials.

### References for Supplementary Information:

1. A. I. Chen, M. L. Balter, T. J. Maguire, M. L. Yarmush, Deep learning robotic guidance for autonomous vascular access. *Nat. Mach. Intell.* (2020), doi:10.1038/s42256-020-0148-7.
2. H. F. Machiel Van der Loos, N. Ullrich, H. Kobayashi, Development of sensate and robotic bed technologies for vital signs monitoring and sleep quality improvement. *Auton. Robots* (2003), doi:10.1023/A:1024444917917.
3. E. Broadbent, J. R. Orejana, H. S. Ahn, J. Xie, P. Rouse, B. A. Macdonald, in *Proceedings - IEEE International Workshop on Robot and Human Interactive Communication* (2015).
